# Supplementary material for: N, O-codoped hierarchical porous carbons derived from algae for high-capacity supercapacitors and battery anodes
Source: Royal Society of Chemistry journal article supplement (doi:10.1039/c6ta01821a), 2016-01-01
Supplement: c6ta01821a1.pdf [file c6ta01821a1.pdf]

## Supporting Information for

N, O-codoped hierarchical porous carbons derived from algae  
for high-capacity supercapacitors and battery anodes

Wenhua Yu, Huanlei Wang, \* Shuang Liu, Nan Mao, Xiao Liu, Jing Shi, Wei Liu,  
Shougang Chen, and Xin Wang

*Institute of Materials Science and Engineering, Ocean University of China, Qingdao  
266100, China*

\* Email: [huanleiwang@gmail.com](mailto:huanleiwang@gmail.com); [huanleiwang@ouc.edu.cn](mailto:huanleiwang@ouc.edu.cn).

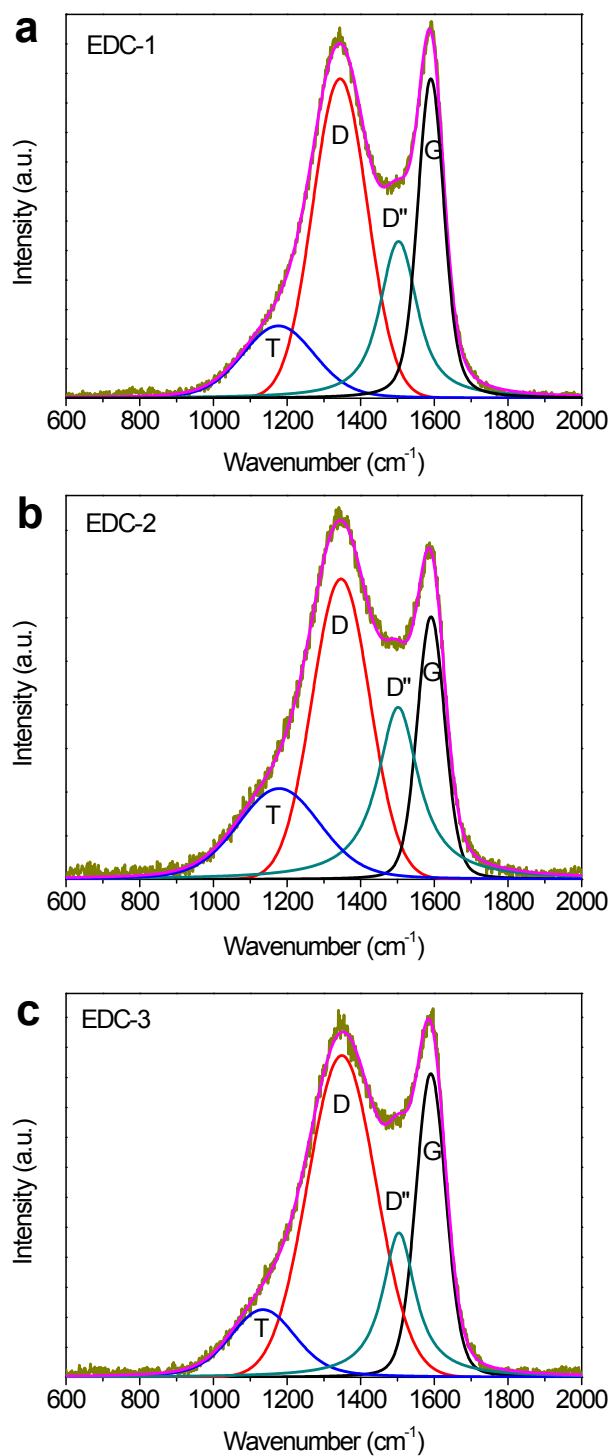

**Fig. S1** Fitted Raman spectra of (a) EDC-1, (b) EDC-2, and (c) EDC-3 specimens by using Voigt function.

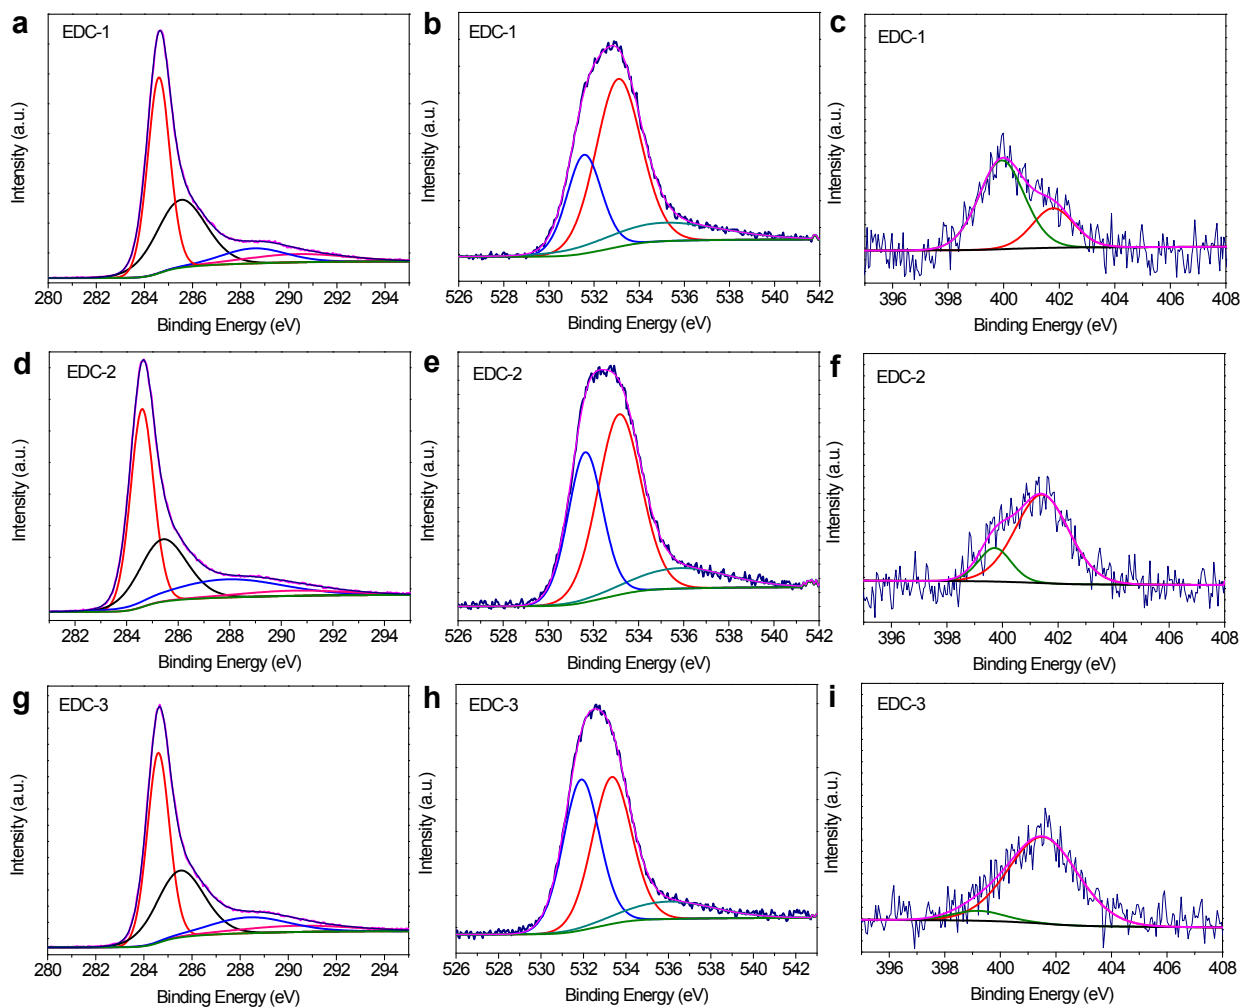

**Fig. S2** High-resolution XPS (a) C 1s, (b) O 1s, and (c) N 1s spectra of EDC-1. High-resolution XPS (d) C 1s, (e) O 1s, and (f) N 1s spectra of EDC-2. High-resolution XPS (g) C 1s, (h) O 1s, and (i) N 1s spectra of EDC-3.

**Table S1** Relative surface concentrations (%) of nitrogen and oxygen species obtained by fitting the N 1s and O 1s core level XPS spectra.

| Sample | N-5   | N-Q   | O-I   | O-II  | O-III |
|--------|-------|-------|-------|-------|-------|
| EDC-1  | 71.04 | 28.96 | 25.93 | 57.61 | 16.46 |
| EDC-2  | 18.75 | 81.25 | 34.53 | 53.29 | 13.07 |
| EDC-3  | 7.94  | 92.06 | 42.84 | 44.97 | 12.19 |

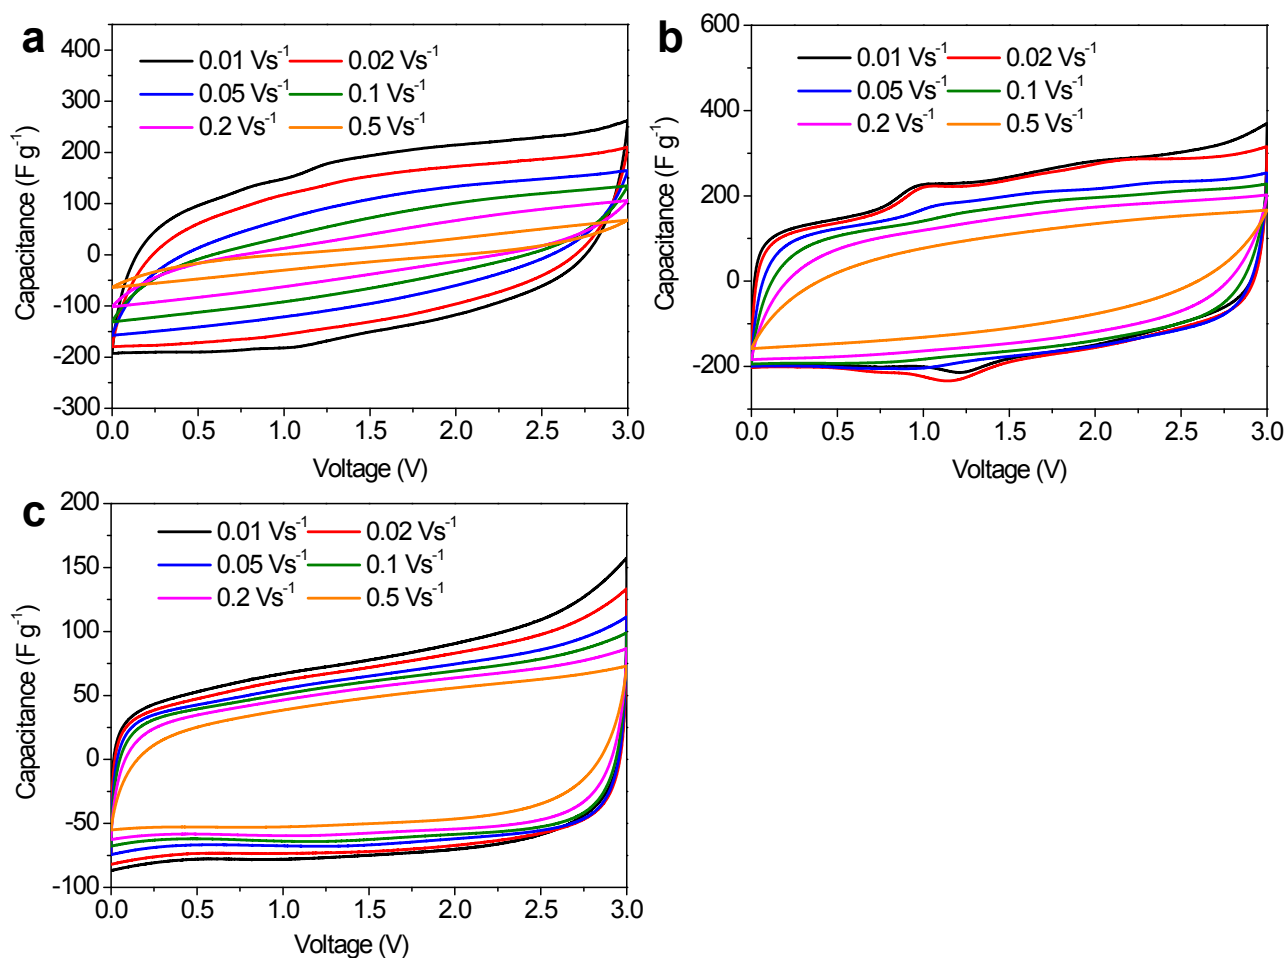

**Fig. S3** CV curves of (a) EDC-1, (b) EDC-2, and (c) AC for different scan rates, tested at 20 °C.

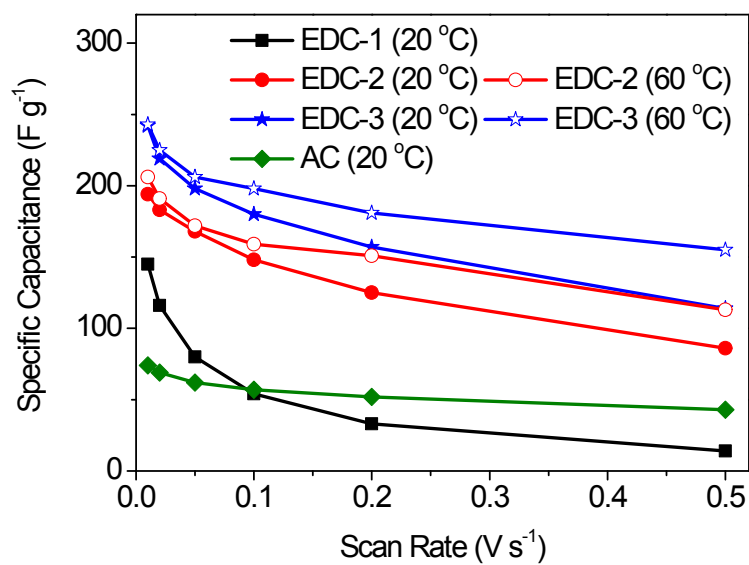

**Fig. S4** Specific capacitance as a function of scan rates.

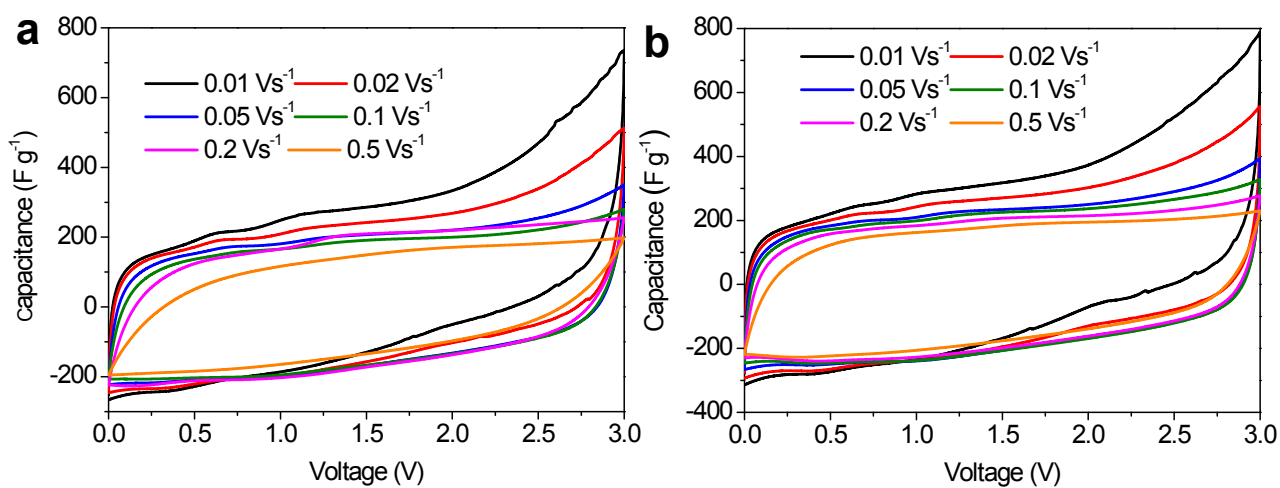

**Fig. S5** CV curves of (a) EDC-2 and (b) EDC-3 for different scan rates, tested at 60 °C.

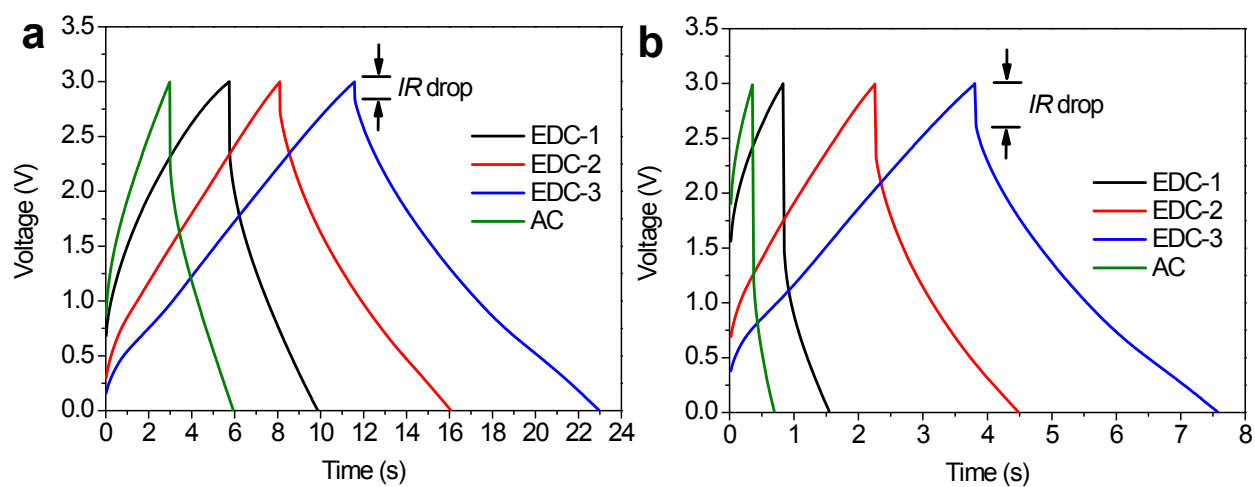

**Fig. S6** Galvanostatic charge-discharge profiles of EDCs and AC, tested at a current density of (a) 20 A g<sup>-1</sup>, and (b) 50 A g<sup>-1</sup>.

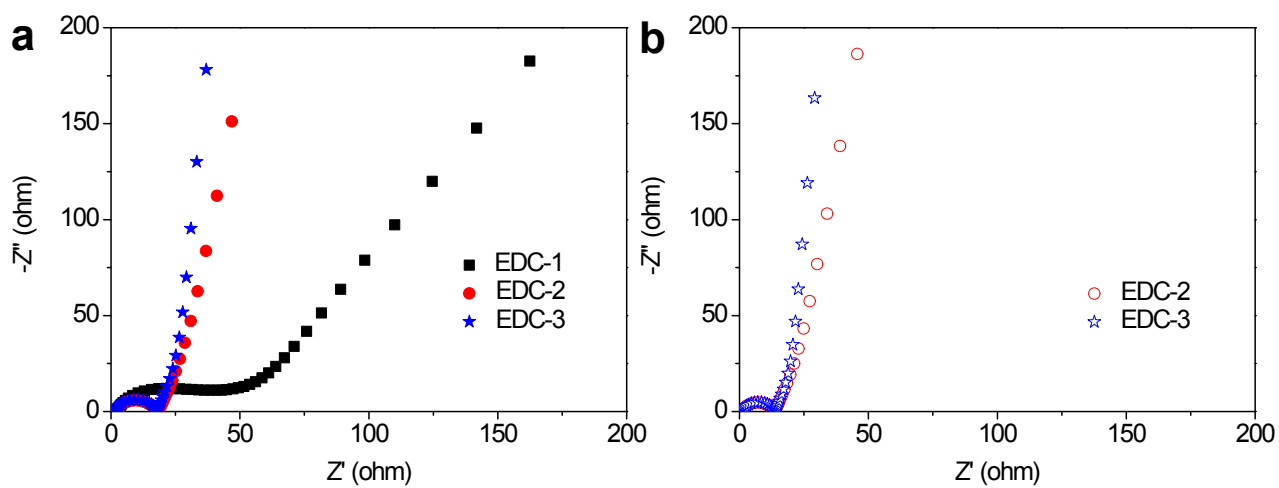

**Fig. S7** Nyquist plots of the EDC electrodes in ionic liquid electrolyte, tested at (a) 20 °C and (b) 60 °C.

**Table S2** Comparison of capacitance and energy density of carbon-based electrodes for supercapacitors.

| Sample                                         | Electrolyte             | Testing temperature | Capacity at low current                             | Capacity at high current                              | Capacity retention                                | Cyclability                                         | Voltage | Maximum Energy                                   | Energy at high power                                                         |
|------------------------------------------------|-------------------------|---------------------|-----------------------------------------------------|-------------------------------------------------------|---------------------------------------------------|-----------------------------------------------------|---------|--------------------------------------------------|------------------------------------------------------------------------------|
| 3D ordered mesoporous carbon <sup>1</sup>      | EMI-TFSI                | 20 °C               | 146–178 F g <sup>-1</sup> (0.5 A g <sup>-1</sup> )  | 80–123 F g <sup>-1</sup> (25 A g <sup>-1</sup> )      | > 50 % (0.5-25 A g <sup>-1</sup> ) <sup>1</sup> ) | 90% after 1000 cycles (5 A g <sup>-1</sup> )        | 0-3.5   | -                                                | -                                                                            |
| 3D Carbon <sup>2</sup>                         | EMIMBF <sub>4</sub>     | 20 °C               | 196 F g <sup>-1</sup> (0.5 A g <sup>-1</sup> )      | 133 F g <sup>-1</sup> (10 A g <sup>-1</sup> )         | 67.8 % (0.5-10 A g <sup>-1</sup> ) <sup>1</sup> ) | -                                                   | 0-3.5   | 91.4 Wh kg <sup>-1</sup>                         | 70 Wh kg <sup>-1</sup> (1223 W kg <sup>-1</sup> )                            |
| carbons derived from biowaste <sup>3</sup>     | EMIM TFSI               | 60 °C               | 161.5 F g <sup>-1</sup> (0.1 A g <sup>-1</sup> )    | 95.3 F g <sup>-1</sup> (10 A g <sup>-1</sup> )        | 59 % (0.1-10 A g <sup>-1</sup> ) <sup>1</sup> )   | 91% after 5000 cycles (10 A g <sup>-1</sup> )       | 0-3     | 51 Wh kg <sup>-1</sup> (375 W kg <sup>-1</sup> ) | 26–31Wh kg <sup>-1</sup> (6760–7000 W kg <sup>-1</sup> )                     |
|                                                | BMPY TFSI               |                     | 163.3 F g <sup>-1</sup> (0.1 A g <sup>-1</sup> )    | 121.7 F g <sup>-1</sup> (10 A g <sup>-1</sup> )       | 74.5 % (0.1-10 A g <sup>-1</sup> ) <sup>1</sup> ) |                                                     |         |                                                  |                                                                              |
| Nitrogen-doped carbon nanosheets <sup>4</sup>  | EMIMBF <sub>4</sub>     | 20 °C               | 242 F g <sup>-1</sup> (0.1 A g <sup>-1</sup> )      | 155 F g <sup>-1</sup> (10 A g <sup>-1</sup> )         | 64 % (0.1-10 A g <sup>-1</sup> ) <sup>1</sup> )   | 92% after 10000 cycles (2A g <sup>-1</sup> )        | 0-3.5   | 90 Wh kg <sup>-1</sup> (875 W kg <sup>-1</sup> ) | 52.5 W h kg <sup>-1</sup> (8750 W kg <sup>-1</sup> )                         |
| Interconnect ed carbon nanosheets <sup>5</sup> | BMPY TFSI               | 0-100 °C            | 157 F g <sup>-1</sup> (1 A g <sup>-1</sup> , 20 °C) | 113 F g <sup>-1</sup> (100 A g <sup>-1</sup> , 20 °C) | 72% (0.1-100 A g <sup>-1</sup> )                  | 96% after 10000 cycles at 10Ag <sup>-1</sup> (60°C) | 0-3     | -                                                | 19, 34 and 40 Wh kg <sup>-1</sup> at 20 kW kg <sup>-1</sup> (20, 60, 100 °C) |
| Microporous carbon nanoplates <sup>6</sup>     | BMIMBF <sub>4</sub> /AN | 20 °C               | 168 F g <sup>-1</sup> (0.8 A g <sup>-1</sup> )      | -                                                     | -                                                 | 96.5 % after 10000 cycles ( 2.5 A g <sup>-1</sup> ) | 0-3.5   | -                                                | -                                                                            |
| Nanocarbons <sup>7</sup>                       | EMIMBF <sub>4</sub>     | 20 °C               | 145 F g <sup>-1</sup> (0.5 A g <sup>-1</sup> )      | 120 F g <sup>-1</sup> (2 A g <sup>-1</sup> )          | -                                                 | -                                                   | 0-4     | 80 Wh kg <sup>-1</sup>                           | -                                                                            |
| N-doping mesoporous carbon <sup>8</sup>        | EMI-TFSI                | 20 °C               | 237 F g <sup>-1</sup> (0.1 A g <sup>-1</sup> )      | 151 F g <sup>-1</sup> (10 A g <sup>-1</sup> )         | 63.7 % (0.1-10 A g <sup>-1</sup> ) <sup>1</sup> ) | ~95% after 1000 cycles ( 1 A g <sup>-1</sup> )      | 0-3.5   | 83 Wh kg <sup>-1</sup>                           | -                                                                            |
| Shape-controlled porous nanocarbons            | EMIMBF <sub>4</sub>     | 20 °C               | 140 F g <sup>-1</sup> (1 A g <sup>-1</sup> )        | 105.9 F g <sup>-1</sup> (50 A g <sup>-1</sup> )       | 75.6 % (1-50 A g <sup>-1</sup> )                  | -                                                   | 0-3.5   | 56.6 Wh kg <sup>-1</sup> <sup>1</sup>            | 50.5 Wh kg <sup>-1</sup> (17.4 kW kg <sup>-1</sup> )                         |

|                                                        |                         |       |                                                     |                                                    |                                             |                                                    |          |                                                              |                                                                |
|--------------------------------------------------------|-------------------------|-------|-----------------------------------------------------|----------------------------------------------------|---------------------------------------------|----------------------------------------------------|----------|--------------------------------------------------------------|----------------------------------------------------------------|
| Activated graphene-based carbons <sup>10</sup>         | BMIM TFSI /AN           | 20 °C | 173 F g <sup>-1</sup><br>(2.1 A g <sup>-1</sup> )   | 174 F g <sup>-1</sup><br>(8.4 A g <sup>-1</sup> )  | -                                           | 94% after 1000 cycles<br>(2Ag <sup>-1</sup> )      | 0-3.5    | 74 Wh kg <sup>-1</sup>                                       | -                                                              |
|                                                        | BMIMBF <sub>4</sub> /AN |       | 167 F g <sup>-1</sup><br>(2.1 A g <sup>-1</sup> )   | 167 F g <sup>-1</sup><br>(8.4 A g <sup>-1</sup> )  | -                                           | ( EMIMTFSI)                                        |          |                                                              |                                                                |
| Porous 3D graphene-based bulk Material <sup>11</sup>   | EMIMBF <sub>4</sub>     | 20 °C | 231 F g <sup>-1</sup><br>(1 A g <sup>-1</sup> )     | 210 F g <sup>-1</sup><br>(10 A g <sup>-1</sup> )   | 90.9 %<br>(1-10 A g <sup>-1</sup> )         | 94% after 5000 cycles<br>(1A g <sup>-1</sup> )     | 0-3.5    | 98 Wh kg <sup>-1</sup>                                       | -                                                              |
| rGO + SWCNT <sup>12</sup>                              | BMIMBF <sub>4</sub>     | 20 °C | 222 F g <sup>-1</sup><br>(1 A g <sup>-1</sup> )     | -                                                  | -                                           | 99% after 1000 cycles<br>(1A g <sup>-1</sup> )     | 0-3.5    | 106.6 Wh kg <sup>-1</sup><br>(1.19 kW kg <sup>-1</sup> )     | 58.9 Wh kg <sup>-1</sup><br>(10.9 kW kg <sup>-1</sup> )        |
| Carbon nanotube spaced graphene aerogels <sup>13</sup> | EMIMBF <sub>4</sub>     | 20 °C | 183.3 F g <sup>-1</sup><br>(0.5 A g <sup>-1</sup> ) | 154.3 F g <sup>-1</sup><br>(10 A g <sup>-1</sup> ) | 84.1%<br>(0.5-10 A g <sup>-1</sup> )<br>1)  | 94% after 2000 cycles<br>(2 A g <sup>-1</sup> )    | 0-3.5    | 8.5 Wh kg <sup>-1</sup><br>(438 W kg <sup>-1</sup> )<br>1)   | 65.6 Wh kg <sup>-1</sup><br>(9.1 kW kg <sup>-1</sup> )         |
| Carbon naotube-bridged graphene <sup>14</sup>          | EMIMBF <sub>4</sub>     | 20 °C | 199 F g <sup>-1</sup><br>(0.5 A g <sup>-1</sup> )   | 99 F g <sup>-1</sup><br>(20 A g <sup>-1</sup> )    | 49.7 %<br>(0.5-20 A g <sup>-1</sup> )<br>1) | 98.2% after 10000 cycles (10 A g <sup>-1</sup> )   | 0-4      | 110.6 Wh kg <sup>-1</sup>                                    | -                                                              |
| Porous carbons <sup>15</sup>                           | EMIMBF <sub>4</sub>     | 25°C  | 146.5 F g <sup>-1</sup><br>(1 A g <sup>-1</sup> )   | 50.2 F g <sup>-1</sup><br>(20Ag <sup>-1</sup> )    | 34.3 %<br>(1-20 A g <sup>-1</sup> )         | 85.7% after 5000 cycles<br>(10 A g <sup>-1</sup> ) | -1.5-1.5 | -                                                            | -                                                              |
|                                                        |                         | 50°C  | 220.3 F g <sup>-1</sup><br>(1 A g <sup>-1</sup> )   | 96.5 F g <sup>-1</sup><br>(20 A g <sup>-1</sup> )  | 43.8 %<br>(1-20 A g <sup>-1</sup> )         | 92.5% after 5000 cycles<br>(10 A g <sup>-1</sup> ) |          |                                                              |                                                                |
|                                                        |                         | 80°C  | 295.6 F g <sup>-1</sup><br>(1 A g <sup>-1</sup> )   | 110.2 F g <sup>-1</sup><br>(20 A g <sup>-1</sup> ) | 37.3 %<br>(1-20 A g <sup>-1</sup> )         | 92.9% after 5000 cycles<br>(10 A g <sup>-1</sup> ) |          |                                                              |                                                                |
| Hierarchical nanoporous Carbon <sup>16</sup>           | EMIM TFSI               | 60 °C | 146 F g <sup>-1</sup><br>(0.2 A g <sup>-1</sup> )   | 108 F g <sup>-1</sup><br>(50 A g <sup>-1</sup> )   | 74 %<br>(0.2-50 A g <sup>-1</sup> )<br>1)   | 95% after 5000 cycles<br>(1 A g <sup>-1</sup> )    | 0-3.5    | 58.6 W h kg <sup>-1</sup><br>1)<br>(166 W kg <sup>-1</sup> ) | 43.3 Wh kg <sup>-1</sup><br>(42 000 W kg <sup>-1</sup> )<br>1) |
| Carbons from renewable sources <sup>17</sup>           | EMIM TFSI               | 20 °C | 170 F g <sup>-1</sup><br>(1 A g <sup>-1</sup> )     | 140 F g <sup>-1</sup><br>(60 A g <sup>-1</sup> )   | 82 %<br>(1-60 A g <sup>-1</sup> )           | 90% after 10000 cycles (10 A g <sup>-1</sup> )     | 0-3      | 50-60 Wh kg <sup>-1</sup>                                    | 20 Wh kg <sup>-1</sup><br>(42 kW kg <sup>-1</sup> )            |
|                                                        |                         | 60 °C | 180Fg <sup>-1</sup><br>(1 A g <sup>-1</sup> )       | 130 F g <sup>-1</sup><br>(120 A g <sup>-1</sup> )  | 72 %<br>(1-120 A g <sup>-1</sup> )<br>1)    |                                                    |          |                                                              | 20 Wh kg <sup>-1</sup><br>(55 kW kg <sup>-1</sup> )            |
| EDCs (this work)                                       | EMIMBF <sub>4</sub>     | 20 °C | 201 F g <sup>-1</sup><br>(1 A g <sup>-1</sup> )     | 122 F g <sup>-1</sup><br>(100 A g <sup>-1</sup> )  | 61 %<br>(1-100 A g <sup>-1</sup> )          | 91% after 10000                                    | 0-3      | 62 Wh kg <sup>-1</sup>                                       | 24 Wh kg <sup>-1</sup><br>(60 kW kg <sup>-1</sup> )            |



|       |                                                 |                                                   |                                                 |                                                     |
|-------|-------------------------------------------------|---------------------------------------------------|-------------------------------------------------|-----------------------------------------------------|
|       |                                                 |                                                   | <sup>1)</sup> cycles (10 A<br>g <sup>-1</sup> ) |                                                     |
| 60 °C | 196 F g <sup>-1</sup><br>(1 A g <sup>-1</sup> ) | 140 F g <sup>-1</sup><br>(100 A g <sup>-1</sup> ) | 72 %<br>(1-100 A g <sup>-1</sup> )              | 35 Wh kg <sup>-1</sup><br>(60 kW kg <sup>-1</sup> ) |
|       |                                                 |                                                   | <sup>1)</sup>                                   |                                                     |

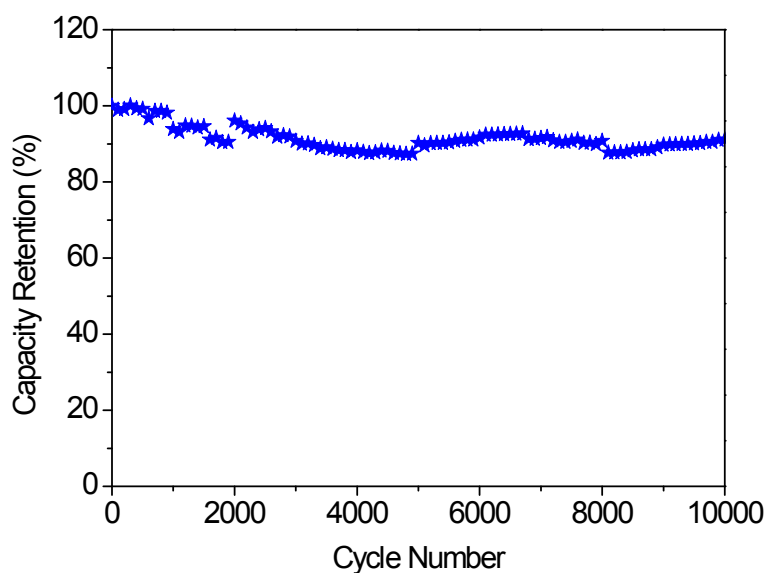

**Fig. S8** Capacitance retention *versus* the cycle number for EDC-3, measured at 10 A g<sup>-1</sup> and 20 °C.

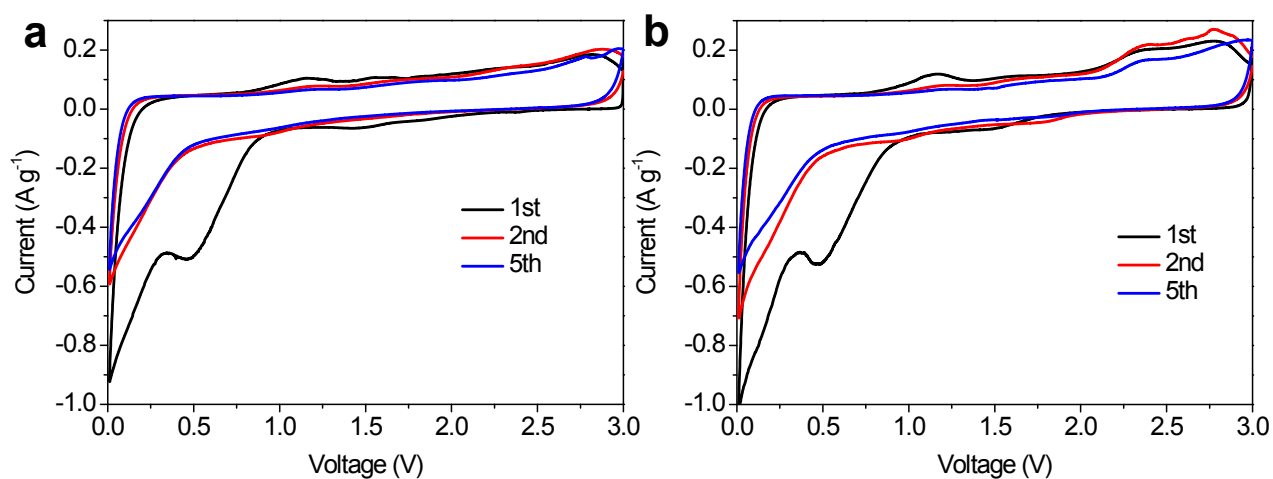

**Fig. S9** (a) CV curves of EDC-1 at 0.1 mV s<sup>-1</sup>. (b) CV curves of EDC-2 at 0.1 mV s<sup>-1</sup>.

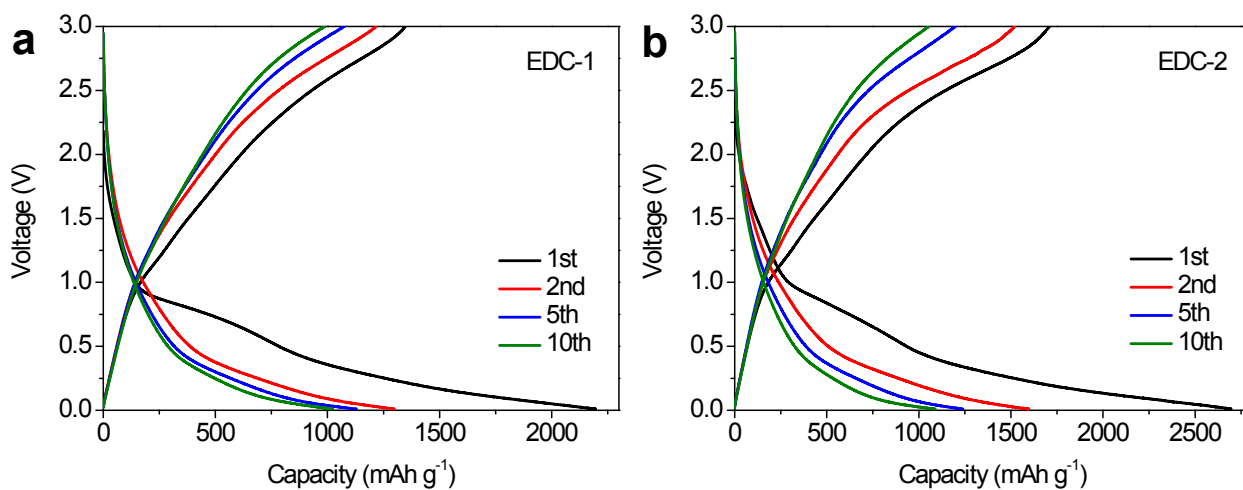

**Fig. S10** Charge-discharge curves of (a) EDC-1 and (b) EDC-2 at 0.1 A g<sup>-1</sup>.

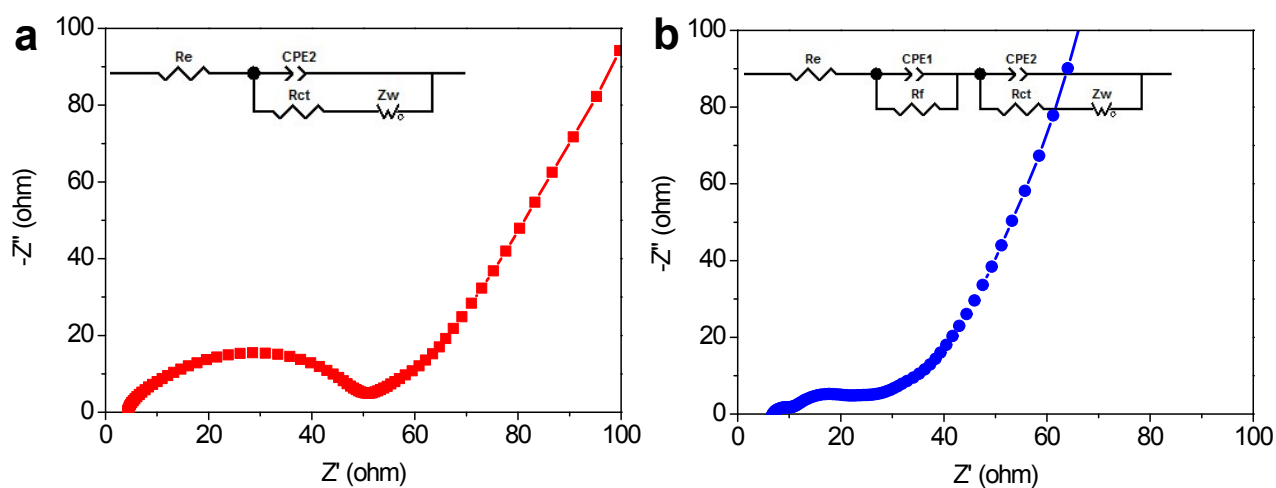

**Fig. S11** Nyquist plots of the EDC-3 electrode (a) before cycling and (b) after 500 cycles. Inset is the used equivalent circuit.

**Table S3** Comparison of capacity of carbon-based electrodes for lithium ion battery.

| Sample                                                                            | Electrolyte           | Voltage | Initial coulombic efficiency | Rate capacity                                                                                                                                                                                                                                                                                                                                 | Cyclability                                                                                                                                                          |
|-----------------------------------------------------------------------------------|-----------------------|---------|------------------------------|-----------------------------------------------------------------------------------------------------------------------------------------------------------------------------------------------------------------------------------------------------------------------------------------------------------------------------------------------|----------------------------------------------------------------------------------------------------------------------------------------------------------------------|
| Carbon nanobubbles <sup>18</sup>                                                  | 1M LiPF <sub>6</sub>  | 0-3V    | 50%                          | 1394 mAh g <sup>-1</sup> at 1A g <sup>-1</sup> ;<br>622 mAh g <sup>-1</sup> at 5 A g <sup>-1</sup> ;<br>498 mAh g <sup>-1</sup> at 10 A g <sup>-1</sup> ;                                                                                                                                                                                     | ~100 % capacity retention at 100 cycle and 10 A g <sup>-1</sup>                                                                                                      |
| Hierarchically porous nitrogen-rich carbon <sup>19</sup>                          | LiPF <sub>6</sub>     | 0-3V    | 64%                          | 1470 mAh g <sup>-1</sup> at 0.037 A g <sup>-1</sup> ;<br>975 mAh g <sup>-1</sup> at 0.37 A g <sup>-1</sup> ;<br>344 mAh g <sup>-1</sup> at 18.5 A g <sup>-1</sup> ;<br>198 mAh g <sup>-1</sup> at 37 A g <sup>-1</sup> ;                                                                                                                      | 976 mAh g <sup>-1</sup> at 300 cycle and 0.37 A g <sup>-1</sup> ;<br>659 mAh g <sup>-1</sup> at 300 cycle and 3.7 A g <sup>-1</sup>                                  |
| Nitrogen-doped porous carbon <sup>20</sup>                                        | 1 M LiPF <sub>6</sub> | 0.01-3V | 58.4%                        | 2163 mAh g <sup>-1</sup> at 100 mA g <sup>-1</sup> ;<br>1790 mAh g <sup>-1</sup> at 200 mA g <sup>-1</sup> ;<br>1588 mAh g <sup>-1</sup> at 400 mA g <sup>-1</sup> ;<br>1463 mAh g <sup>-1</sup> at 600 mA g <sup>-1</sup> ;<br>1361 mAh g <sup>-1</sup> at 800 mA g <sup>-1</sup> ;<br>1182 mAh g <sup>-1</sup> at 1600 mA g <sup>-1</sup> ; | 785 mAh g <sup>-1</sup> after 1000 cycles and 5 A g <sup>-1</sup> ;<br>2132 mAh g <sup>-1</sup> after 50 cycles and 0.1 Ag <sup>-1</sup> (99.2% capacity retention)  |
| Porous graphene <sup>21</sup>                                                     | 1M LiPF <sub>6</sub>  | 0.01-3V | 52%                          | 860 mAh g <sup>-1</sup> at 0.5 A g <sup>-1</sup> ;<br>560 mAh g <sup>-1</sup> at 5 A g <sup>-1</sup> ;<br>220 mAh g <sup>-1</sup> at 80 A g <sup>-1</sup> ;                                                                                                                                                                                   | 470 mAh g <sup>-1</sup> after 2000 cycles and 10 A g <sup>-1</sup>                                                                                                   |
| Hybrid carbon naotube and graphene nanostructures <sup>22</sup>                   | 1M LiPF <sub>6</sub>  | 0.01-3V | ~54%                         | 900 mAh g <sup>-1</sup> at 100 mA g <sup>-1</sup> ;<br>526 mAh g <sup>-1</sup> at 900 mA g <sup>-1</sup> ;<br>370 mAh g <sup>-1</sup> at 1500 mA g <sup>-1</sup> ;                                                                                                                                                                            | 98.92% after 250 cycles and 600 mA g <sup>-1</sup>                                                                                                                   |
| Amorphous carbon nanotubes with hollow graphitic carbon nanospheres <sup>23</sup> | 1M LiPF <sub>6</sub>  | 0-3V    | 55.9%                        | 960 mAh g <sup>-1</sup> at 0.05 A g <sup>-1</sup> ;<br>748 mAh g <sup>-1</sup> at 0.1 A g <sup>-1</sup> ;<br>573 mAh g <sup>-1</sup> at 0.25 A g <sup>-1</sup> ;<br>456 mAh g <sup>-1</sup> at 0.5 A g <sup>-1</sup> ;<br>400 mAh g <sup>-1</sup> at 1.85 A g <sup>-1</sup> ;<br>330 mA h g <sup>-1</sup> at 3.7 A g <sup>-1</sup> ;          | 965 mA h g <sup>-1</sup> after 100 cycles and 0.05A g <sup>-1</sup> ;<br>330 mA h g <sup>-1</sup> after 650 cycles and 3.7 A g <sup>-1</sup> ;                       |
| Hollow carbon nanotube/carbon nanofiber hybrid anodes <sup>24</sup>               | 1M LiPF <sub>6</sub>  | 0-3V    | 62.2%                        | 940 mAh g <sup>-1</sup> at 0.5 A g <sup>-1</sup> ;<br>700 mAh g <sup>-1</sup> at 1 A g <sup>-1</sup> ;<br>500 mAh g <sup>-1</sup> at 3 A g <sup>-1</sup> ;<br>380 mAh g <sup>-1</sup> at 5 A g <sup>-1</sup> ;<br>320 mAh g <sup>-1</sup> at 8 A g <sup>-1</sup> ;                                                                            | 1150 mAh g <sup>-1</sup> after 70 cycles and 0.1 A g <sup>-1</sup> ;<br>320 mAh g <sup>-1</sup> after 3500 cycles and 8 A g <sup>-1</sup> (> 80% capacity retention) |

|                                                                     |                       |            |         |                                                                                                                                                                                                                                                                        |                                                                                                                                               |
|---------------------------------------------------------------------|-----------------------|------------|---------|------------------------------------------------------------------------------------------------------------------------------------------------------------------------------------------------------------------------------------------------------------------------|-----------------------------------------------------------------------------------------------------------------------------------------------|
| Folded structured graphene paper <sup>25</sup>                      | 1 M LiPF <sub>6</sub> | 0.01–3.5 V | 79.2%   | 557 mAh g <sup>-1</sup> at 0.2 A g <sup>-1</sup> ;<br>268 mAh g <sup>-1</sup> at 0.5A g <sup>-1</sup> ;<br>169 mAh g <sup>-1</sup> at 1 A g <sup>-1</sup> ;<br>141mAh g <sup>-1</sup> at 1.5A g <sup>-1</sup> ;                                                        | -                                                                                                                                             |
| Nitrogen-doped porous carbon nanofiber webs <sup>26</sup>           | 1 M LiPF <sub>6</sub> | 0.01–3 V   | 48.4%   | 924 mAh g <sup>-1</sup> at 0.5 A g <sup>-1</sup> ;<br>773 mAh g <sup>-1</sup> at 1 A g <sup>-1</sup> ;<br>637 mAh g <sup>-1</sup> at 2 A g <sup>-1</sup> ;<br>505 mAh g <sup>-1</sup> at 5 A g <sup>-1</sup> ;<br>321 mAh g <sup>-1</sup> at 10 A g <sup>-1</sup> ;    | 943 mAh g <sup>-1</sup> after 600 cycles and 2 A g <sup>-1</sup>                                                                              |
| Two-dimensional mesoporous carbon nanosheets <sup>27</sup>          | 1 M LiPF <sub>6</sub> | 0.01-3V    | < 30%   | 770 mAh g <sup>-1</sup> at 0.1 A g <sup>-1</sup> ;<br>540 mAh g <sup>-1</sup> at 0.2 A g <sup>-1</sup> ;<br>430 mAh g <sup>-1</sup> at 0.5 A g <sup>-1</sup> ;<br>370 mAh g <sup>-1</sup> at 1 A g <sup>-1</sup> ;<br>255 mAh g <sup>-1</sup> at 5 A g <sup>-1</sup> ; | -                                                                                                                                             |
| Branched graphene nanocapsules <sup>28</sup>                        | 1 M LiPF <sub>6</sub> | 0.01-3V    | 66.2%   | 1340 mAh g <sup>-1</sup> at 0.4 A g <sup>-1</sup> ;<br>750 mAh g <sup>-1</sup> at 8 A g <sup>-1</sup> ;<br>447 mAh g <sup>-1</sup> at 20 A g <sup>-1</sup> ;                                                                                                           | 1373 mAh g <sup>-1</sup> after 200 cycles and 0.5A g <sup>-1</sup> ;<br>604 mAh g <sup>-1</sup> after 5000 cycles and 15 A g <sup>-1</sup> ;  |
| Mesoporous nitrogen-rich carbons derived from protein <sup>29</sup> | 1 M LiPF <sub>6</sub> | 0.01-3V    | 55-65%  | 865 mAh g <sup>-1</sup> at 0.3 A g <sup>-1</sup> ;<br>460 mAh g <sup>-1</sup> at 1 A g <sup>-1</sup> ;<br>205 mAh g <sup>-1</sup> at 4 A g <sup>-1</sup> ;                                                                                                             | 70% after 100 cycles and 0.5 A g <sup>-1</sup>                                                                                                |
| Carbon nanorings <sup>30</sup>                                      | 1 M LiPF <sub>6</sub> | 0.01-3V    | 62.1%   | 1216 mAh g <sup>-1</sup> at 1 A g <sup>-1</sup> ;<br>939 mAh g <sup>-1</sup> at 4.8 A g <sup>-1</sup> ;<br>758 mAh g <sup>-1</sup> at 15 A g <sup>-1</sup> ;<br>508 mAh g <sup>-1</sup> at 45 A g <sup>-1</sup> ;                                                      | 1263 mAh g <sup>-1</sup> after 100 cycles and 0.4 A g <sup>-1</sup>                                                                           |
| Nitrogen-doped carbon capsules <sup>31</sup>                        | 1 M LiPF <sub>6</sub> | 0.01-3V    | 90.2%   | 920 mAh g <sup>-1</sup> at 0.1 A g <sup>-1</sup> ;<br>285 mAh g <sup>-1</sup> at 20 A g <sup>-1</sup> ;                                                                                                                                                                | 1046 mAh g <sup>-1</sup> after 50 cycles and 50 mA g <sup>-1</sup> ;<br>750 mAh g <sup>-1</sup> after 600 cycles and 2 A g <sup>-1</sup> ;    |
| Sulfur-doped porous carbons hybridized with graphene <sup>32</sup>  | 1 M LiPF <sub>6</sub> | 0.01-3 V   | 55.6%   | 1400 mAh g <sup>-1</sup> at 0.05 A g <sup>-1</sup> ;<br>280 mAh g <sup>-1</sup> at 20 A g <sup>-1</sup> ;                                                                                                                                                              | 780 mAh g <sup>-1</sup> after 500 cycles and 1A g <sup>-1</sup>                                                                               |
| Nitrogen and sulfur codoped graphene <sup>33</sup>                  | 1 M LiPF <sub>6</sub> | 0.005-3V   | 44.7%   | 896 mAh g <sup>-1</sup> at 0.4 A g <sup>-1</sup> ;<br>882 mAh g <sup>-1</sup> at 0.8A g <sup>-1</sup> ;<br>844 mAh g <sup>-1</sup> at 2 A g <sup>-1</sup> ;<br>297 mAh g <sup>-1</sup> at 5 A g <sup>-1</sup> ;                                                        | 1090 mAh g <sup>-1</sup> after 500 cycles and 0.2A g <sup>-1</sup>                                                                            |
| Porous carbon nanofiber <sup>34</sup>                               | 1 M LiPF <sub>6</sub> | 0.001-3V   | ~54-55% | 1950 mAh g <sup>-1</sup> at 0.1 A g <sup>-1</sup> ;<br>1000 mAh g <sup>-1</sup> at 0.5 A g <sup>-1</sup> ;<br>723 mAh g <sup>-1</sup> at 1 A g <sup>-1</sup> ;<br>357 mAh g <sup>-1</sup> at 5 A g <sup>-1</sup> ;                                                     | 178 0mAh g <sup>-1</sup> after 40 cycles and 50 mA g <sup>-1</sup> ;<br>1500mAh g <sup>-1</sup> after 600 cycles and 500 mA g <sup>-1</sup> ; |

|                                                                          |                       |          |        |                                                                                                                                                                                                                                                                          |                                                                                                                                                     |
|--------------------------------------------------------------------------|-----------------------|----------|--------|--------------------------------------------------------------------------------------------------------------------------------------------------------------------------------------------------------------------------------------------------------------------------|-----------------------------------------------------------------------------------------------------------------------------------------------------|
|                                                                          |                       |          |        | 272 mAh g <sup>-1</sup> at 10 A g <sup>-1</sup> ;<br>200 mAh g <sup>-1</sup> at 20 A g <sup>-1</sup> ;                                                                                                                                                                   |                                                                                                                                                     |
| Porous carbon<br>nanofiber webs <sup>35</sup>                            | 1 M LiPF <sub>6</sub> | 0.01-3V  | 56%    | 1068 mAh g <sup>-1</sup> at 0.1 A g <sup>-1</sup> ;<br>505 mAh g <sup>-1</sup> at 1 A g <sup>-1</sup> ;<br>436 mAh g <sup>-1</sup> at 2 A g <sup>-1</sup> ;<br>261 mAh g <sup>-1</sup> at 8 A g <sup>-1</sup> ;<br>250 mAh g <sup>-1</sup> at 10 A g <sup>-1</sup> ;     | 857.6 mAh g <sup>-1</sup><br>after 100 cycles and<br>0.1A g <sup>-1</sup>                                                                           |
| 3D carbon<br>nanotubes <sup>36</sup>                                     | 1 M LiPF <sub>6</sub> | 0.01-3V  | -      | 312 mAh g <sup>-1</sup> at 0.2 C ;<br>251 mAh g <sup>-1</sup> at 0.5 C;<br>211 mAh g <sup>-1</sup> at 1 C;<br>155 mAh g <sup>-1</sup> at 3 C;<br>(1 C= 372 mAh g <sup>-1</sup> )                                                                                         | 211-264 mAh g <sup>-1</sup> after<br>50 cycles and 0.5 C                                                                                            |
| 3D hierarchical<br>porous<br>graphene <sup>37</sup>                      | 1 M LiPF <sub>6</sub> | 0.1-3V   | 42%    | 1050 mAh g <sup>-1</sup> at 0.1 A g <sup>-1</sup> ;<br>750 mA h g <sup>-1</sup> at 0.5 A g <sup>-1</sup> ;<br>500 mAh g <sup>-1</sup> at 2 A g <sup>-1</sup> ;<br>400 mAh g <sup>-1</sup> at 10 A g <sup>-1</sup> ;<br>300 mAh g <sup>-1</sup> at 20 A g <sup>-1</sup> ; | 700-1100 mAh g <sup>-1</sup> after<br>100 cycles and 0.1A g <sup>-1</sup>                                                                           |
| Sulfur-doped<br>mesoporous<br>carbon <sup>38</sup>                       | 1 M LiPF <sub>6</sub> | 0.01-3V  | -      | 1042 mAh g <sup>-1</sup> at 0.1 A g <sup>-1</sup> ;<br>675 mA h g <sup>-1</sup> at 0.2 A g <sup>-1</sup> ;<br>583 mAh g <sup>-1</sup> at 0.5 A g <sup>-1</sup> ;<br>441 mAh g <sup>-1</sup> at 1 A g <sup>-1</sup> ;<br>322 mAh g <sup>-1</sup> at 2 A g <sup>-1</sup> ; | 579 mAh g <sup>-1</sup> after 970<br>cycles and 0.5 A g <sup>-1</sup>                                                                               |
| Nitrogen-doped<br>3D macroporous<br>graphene<br>frameworks <sup>39</sup> | 1 M LiPF <sub>6</sub> | 0.005-3V | 49%    | 750 mAh g <sup>-1</sup> at 0.5 A g <sup>-1</sup> ;<br>480 mAh g <sup>-1</sup> at 2 A g <sup>-1</sup> ;                                                                                                                                                                   | 1094 mAh g <sup>-1</sup> after<br>100 cycles and 0.2 A g <sup>-1</sup><br>;<br>691 mAh g <sup>-1</sup> after 500<br>cycles and 1A g <sup>-1</sup> ; |
| EDCs<br>(this work)                                                      | 1 M LiPF <sub>6</sub> | 0.01-3V  | 61-64% | 900-1000 mAh g <sup>-1</sup> at 0.1 A g <sup>-1</sup> ;<br>650 mA h g <sup>-1</sup> at 0.5 A g <sup>-1</sup> ;<br>220 mAh g <sup>-1</sup> at 5 A g <sup>-1</sup> ;<br>170 mAh g <sup>-1</sup> at 10 A g <sup>-1</sup> ;                                                  | 350 mAh g <sup>-1</sup> after 500<br>cycles and 2 A g <sup>-1</sup>                                                                                 |

## References

1. A. Vu, X. Y. Li, J. Phillips, A. J. Han, W. H. Smyrl, P. Buhlmann and A. Stein, *Chem. Mater.*, 2013, **25**, 4137-4148.
2. J. H. Hou, C. B. Cao, X. L. Ma, F. Idrees, B. Xu, X. Hao and W. Lin, *Sci. Rep.*, 2014, **4**, 7260.
3. H. L. Wang, Z. Li, J. K. Tak, C. M. B. Holt, X. H. Tan, Z. W. Xu, B. S. Amirkhiz, D. Hayfield, A. Anyia, T. Stephenson and D. Mitlin, *Carbon*, 2013, **57**, 317-328.
4. J. H. Hou, C. B. Cao, F. Idrees and X. L. Ma, *ACS Nano*, 2015, **9**, 2556-2564.
5. H. Wang, Z. W. Xu, A. Kohandehghan, Z. Li, K. Cui, X. H. Tan, T. J. Stephenson, C. K. King'ondeu, C. M. B. Holt, B. C. Olsen, J. K. Tak, D. Harfield, A. O. Anyia and D. Mitlin, *ACS Nano*, 2013, **7**, 5131-5141.
6. Y. S. Yun, S. Y. Cho, J. Shim, B. H. Kim, S. J. Chang, S. J. Baek, Y. S. Huh, Y. Tak, Y. W. Park, S. Park and H. J. Jin, *Adv. Mater.*, 2013, **25**, 1993-1998.
7. H. T. Zhang, X. Zhang, X. Z. Sun and Y. W. Ma, *Sci. Rep.*, 2013, **3**, 3534.
8. B. E. Wilson, S. Y. He, K. Buffington, S. Rudisill, W. H. Smyrl and A. Stein, *J. Power Sources*, 2015, **298**, 193-202.
9. W. Chen, R. B. Rakhi, M. N. Hedhili and H. N. Alshareef, *J. Mater. Chem. A*, 2014, **2**, 5236-5243.
10. T. Kim, G. Jung, S. Yoo, K. S. Suh and R. S. Ruoff, *ACS Nano*, 2013, **7**, 6899-6905.
11. L. Zhang, F. Zhang, X. Yang, G. K. Long, Y. P. Wu, T. F. Zhang, K. Leng, Y. Huang, Y. F. Ma, A. Yu and Y. S. Chen, *Sci. Rep.*, 2013, **3**, 1408.
12. N. Jha, P. Ramesh, E. Bekyarova, M. E. Itkis and R. C. Haddon, *Adv. Energy Mater.*, 2012, **2**, 438-444.
13. Q. G. Shao, J. Tang, Y. X. Lin, J. Li, F. X. Qin, J. S. Yuan and L. C. Qin, *J. Power Sources*, 2015, **278**, 751-759.
14. D. T. Pham, T. H. Lee, D. H. Luong, F. Yao, A. Ghosh, V. T. Le, T. H. Kim, B. Li, J. Chang and Y. H. Lee, *ACS Nano*, 2015, **9**, 2018-2027.
15. X. Y. Chen, D. H. Xie, Z. J. Zhang and C. Chen, *J. Power Sources*, 2014, **246**, 531-539.
16. W. Q. Tian, Q. M. Gao, Y. L. Tan, K. Yang, L. H. Zhu, C. X. Yang and H. Zhang, *J. Mater. Chem. A*, 2015, **3**, 5656-5664.
17. A. B. Fuertes and M. Sevilla, *Carbon*, 2015, **94**, 41-52.
18. H. W. Song, N. Li, H. Cui and C. X. Wang, *Nano Energy*, 2014, **4**, 81-87.
19. L. Chen, Y. Z. Zhang, C. H. Lin, W. Yang, Y. Meng, Y. Guo, M. L. Li and D. Xiao, *J. Mater. Chem. A*, 2014, **2**, 9684-9690.
20. F. C. Zheng, Y. Yang and Q. W. Chen, *Nat. Commun.*, 2014, **5**, 5261.
21. Z. L. Wang, D. Xu, H. G. Wang, Z. Wu and X. B. Zhang, *ACS Nano*, 2013, **7**, 2422-2430.
22. W. Wang, I. Ruiz, S. R. Guo, Z. Favours, H. H. Bay, M. Ozkan and C. S. Ozkan, *Nano Energy*, 2014, **3**, 113-118.
23. Y. M. Chen, Z. G. Lu, L. M. Zhou, Y. W. Mai and H. T. Huang, *Energy Environ. Sci.*, 2012, **5**, 7898-7902.

24. Y. M. Chen, X. Y. Li, K. Park, J. Song, J. H. Hong, L. M. Zhou, Y. W. Mai, H. T. Huang and J. B. Goodenough, *J. Am. Chem. Soc.*, 2013, **135**, 16280-16283.
25. F. Liu, S. Y. Song, D. F. Xue and H. J. Zhang, *Adv. Mater.*, 2012, **24**, 1089-1094.
26. L. Qie, W. M. Chen, Z. H. Wang, Q. G. Shao, X. Li, L. X. Yuan, X. L. Hu, W. X. Zhang and Y. H. Huang, *Adv. Mater.*, 2012, **24**, 2047-2050.
27. Y. Fang, Y. Y. Lv, R. C. Che, H. Y. Wu, X. H. Zhang, D. Gu, G. F. Zheng and D. Y. Zhao, *J. Am. Chem. Soc.*, 2013, **135**, 1524-1530.
28. Y. P. Liu, W. Li, D. K. Shen, C. Wang, X. M. Li, M. Pal, R. Y. Zhang, L. Chen, C. Yao, Y. Wei, Y. H. Li, Y. J. Zhao, H. W. Zhu, W. X. Wang, A. M. El-Toni, F. Zhang and D. Y. Zhao, *Chem. Mater.*, 2015, **27**, 5577-5586.
29. Z. Li, Z. W. Xu, X. H. Tan, H. L. Wang, C. M. B. Holt, T. Stephenson, B. C. Olsen and D. Mitlin, *Energy Environ. Sci.*, 2013, **6**, 871-878.
30. J. Sun, H. M. Liu, X. Chen, D. G. Evans, W. S. Yang and X. Duan, *Adv. Mater.*, 2013, **25**, 1125-1130.
31. C. G. Hu, Y. Xiao, Y. Zhao, N. Chen, Z. P. Zhang, M. H. Cao and L. T. Qu, *Nanoscale*, 2013, **5**, 2726-2733.
32. Y. Yan, Y. X. Yin, S. Xin, Y. G. Guo and L. J. Wan, *Chem. Commun.*, 2012, **48**, 10663-10665.
33. W. Ai, Z. M. Luo, J. Jiang, J. H. Zhu, Z. Z. Du, Z. X. Fan, L. H. Xie, H. Zhang, W. Huang and T. Yu, *Adv. Mater.*, 2014, **26**, 6186-6192.
34. W. H. Li, M. S. Li, M. Wang, L. C. Zeng and Y. Yu, *Nano Energy*, 2015, **13**, 693-701.
35. W. Wang, Y. Sun, B. Liu, S. G. Wang and M. H. Cao, *Carbon*, 2015, **91**, 56-65.
36. C. W. Kang, M. Patel, B. Rangasamy, K. N. Jung, C. L. Xia, S. Shi and W. Choi, *J. Power Sources*, 2015, **299**, 465-471.
37. L. Ren, K. N. Hui, K. S. Hui, Y. D. Liu, X. Qi, J. X. Zhong, Y. Du and J. P. Yang, *Sci. Rep.*, 2015, **5**, 14229.
38. S. L. Zhang, F. Yao, L. Yang, F. Z. Zhang and S. L. Xu, *Carbon*, 2015, **93**, 143-150.
39. X. W. Liu, Y. Wu, Z. Z. Yang, F. S. Pan, X. W. Zhong, J. Q. Wang, L. Gu and Y. Yu, *J. Power Sources*, 2015, **293**, 799-805.
